# Supplementary material
Source: MDPI journal article supplement (https://www.mdpi.com/2071-1050/12/11/4610)
Supplement: s1 [file s1]

# 'Climate Change and Ecosystem Services Questionnaire for the Great Limpopo Trans- frontier Region (GLTR)

Please kindly assist with filling in the questionnaire to the best your ability. Kindly note confidentiality and anonymity is to be maintained at all times. You have the right to participate and withdraw at any time.

Completing the questionnaire will take approximately twenty (20) minutes. Thank you for your assistance

\* Required

1. 1. Location: Village name, Chief or Coordinates

---

2. 2. Gender \*

Mark once where applicable

☐ Female

☐ Male

☐ Other

3. 3. Age \*

Mark the applicable range

- ☐ <20
- ☐ 20-25
- ☐ 25-30
- ☐ 35-40
- ☐ 45-50
- ☐ 55-60
- ☐ 60>

4. 4. Household Size \*

Mark once where applicable

- ☐ 1
- ☐ 2
- ☐ 3
- ☐ 4
- ☐ Above 5

## 5. 5. Household Position \*

Mark once where applicable

- ☐ Mother
- ☐ Father
- ☐ Grandmother
- ☐ Grandfather
- ☐ Uncle
- ☐ Aunt
- ☐ Child
- ☐ Other: \_\_\_\_\_

## 6. 6. Education Level \*

Mark once where applicable

- ☐ Never went to school
- ☐ Primary level
- ☐ Secondary level
- ☐ Certificate level
- ☐ Diploma
- ☐ Undergraduate
- ☐ Post Graduate
- ☐ Other: \_\_\_\_\_

## 7. 7. Working Status

Mark once where applicable

- ☐ Self Employed
- ☐ Unemployed
- ☐ Employed
- ☐ Pensioner
- ☐ Other: \_\_\_\_\_

## 8. 8. Occupation

Mark once where applicable

- ☐ Nurse
- ☐ Teacher
- ☐ Manager
- ☐ Civil Servant
- ☐ Farmer
- ☐ Private
- ☐ NGO
- ☐ National Park Employee
- ☐ Other: \_\_\_\_\_

9. 9. Who is employed in the household?

Mark where applicable

- ☐ Mother
- ☐ Father
- ☐ Uncle
- ☐ Aunt
- ☐ Grandfather
- ☐ Grandmother
- ☐ Other: \_\_\_\_\_

10. 10. Amount earned per month (ZAR)

Mark a single range of income

- ☐ < R 5 000
- ☐ R 5 000-R 10 000
- ☐ R 10 001 - 15 000
- ☐ R 15 001 - 20 000
- ☐ R20 001 - 25 000
- ☐ R 25 001 - 30 000
- ☐ R > 30 000

11. 11. Who is unemployed in the household?

Mark where applicable

☐ Mother

☐ Father

☐ Uncle

☐ Aunt

☐ Grandfather

☐ Grandmother

☐ Other: \_\_\_\_\_

12. 12. Reason for being unemployed

Answer shortly the reason

---

---

---

---

---

13. 13. Rate in terms of availability what provisional ecosystem Services or goods and service you get from the environment in your area. \*

Provisional Services

|                             | Highly Available      | Moderately Available  | Scarce                | Unavailable           |
|-----------------------------|-----------------------|-----------------------|-----------------------|-----------------------|
| Wild fruits                 | <input type="radio"/> | <input type="radio"/> | <input type="radio"/> | <input type="radio"/> |
| Crops                       | <input type="radio"/> | <input type="radio"/> | <input type="radio"/> | <input type="radio"/> |
| Game food                   | <input type="radio"/> | <input type="radio"/> | <input type="radio"/> | <input type="radio"/> |
| Fishing                     | <input type="radio"/> | <input type="radio"/> | <input type="radio"/> | <input type="radio"/> |
| Timber                      | <input type="radio"/> | <input type="radio"/> | <input type="radio"/> | <input type="radio"/> |
| Fuel/ wood                  | <input type="radio"/> | <input type="radio"/> | <input type="radio"/> | <input type="radio"/> |
| Genetic resources           | <input type="radio"/> | <input type="radio"/> | <input type="radio"/> | <input type="radio"/> |
| Medicinal & cosmetic plants | <input type="radio"/> | <input type="radio"/> | <input type="radio"/> | <input type="radio"/> |
| Livestock                   | <input type="radio"/> | <input type="radio"/> | <input type="radio"/> | <input type="radio"/> |
| Freshwater                  | <input type="radio"/> | <input type="radio"/> | <input type="radio"/> | <input type="radio"/> |
| Tree plantations            | <input type="radio"/> | <input type="radio"/> | <input type="radio"/> | <input type="radio"/> |

14. 14. Rate in terms of availability what regulatory ecosystem services or goods and services you get from the environment in your area. \*

Regulatory Services

|                                    | Highly Available      | Moderately Available  | Scarce                | Unavailable           |
|------------------------------------|-----------------------|-----------------------|-----------------------|-----------------------|
| Soil retention and erosion control | <input type="radio"/> | <input type="radio"/> | <input type="radio"/> | <input type="radio"/> |
| Hydrological regulation            | <input type="radio"/> | <input type="radio"/> | <input type="radio"/> | <input type="radio"/> |
| Pollination for useful plants      | <input type="radio"/> | <input type="radio"/> | <input type="radio"/> | <input type="radio"/> |
| Climate regulation                 | <input type="radio"/> | <input type="radio"/> | <input type="radio"/> | <input type="radio"/> |
| Soil purification                  | <input type="radio"/> | <input type="radio"/> | <input type="radio"/> | <input type="radio"/> |
| Waste treatment                    | <input type="radio"/> | <input type="radio"/> | <input type="radio"/> | <input type="radio"/> |
| Water purification                 | <input type="radio"/> | <input type="radio"/> | <input type="radio"/> | <input type="radio"/> |
| Flood buffering                    | <input type="radio"/> | <input type="radio"/> | <input type="radio"/> | <input type="radio"/> |
| Pest prevention                    | <input type="radio"/> | <input type="radio"/> | <input type="radio"/> | <input type="radio"/> |
| Invasive species prevention        | <input type="radio"/> | <input type="radio"/> | <input type="radio"/> | <input type="radio"/> |
| Air Quality                        | <input type="radio"/> | <input type="radio"/> | <input type="radio"/> | <input type="radio"/> |
| Habitat maintenance                | <input type="radio"/> | <input type="radio"/> | <input type="radio"/> | <input type="radio"/> |
| Food web maintenance               | <input type="radio"/> | <input type="radio"/> | <input type="radio"/> | <input type="radio"/> |
| Nursery                            | <input type="radio"/> | <input type="radio"/> | <input type="radio"/> | <input type="radio"/> |
| Climate regulation                 | <input type="radio"/> | <input type="radio"/> | <input type="radio"/> | <input type="radio"/> |



15. 15. Rate in terms of availability what cultural ecosystem services or goods and services you get from the environment in your area. \*

Cultural Services

|                                  | Highly Available      | Moderately Available  | Scarce                | Unavailable           |
|----------------------------------|-----------------------|-----------------------|-----------------------|-----------------------|
| Recreation                       | <input type="radio"/> | <input type="radio"/> | <input type="radio"/> | <input type="radio"/> |
| Tourism and Ecotourism           | <input type="radio"/> | <input type="radio"/> | <input type="radio"/> | <input type="radio"/> |
| Landscape/aesthetic beauty       | <input type="radio"/> | <input type="radio"/> | <input type="radio"/> | <input type="radio"/> |
| Education/ interpretation        | <input type="radio"/> | <input type="radio"/> | <input type="radio"/> | <input type="radio"/> |
| Scientific research              | <input type="radio"/> | <input type="radio"/> | <input type="radio"/> | <input type="radio"/> |
| Traditional Ecological Knowledge | <input type="radio"/> | <input type="radio"/> | <input type="radio"/> | <input type="radio"/> |
| Cultural heritage                | <input type="radio"/> | <input type="radio"/> | <input type="radio"/> | <input type="radio"/> |

16. 16. Natural Disasters and extreme weather events experienced in the last 30 Years

Mark only one per row

|            | Agree                    | Disagree                 |
|------------|--------------------------|--------------------------|
| Drought    | <input type="checkbox"/> | <input type="checkbox"/> |
| Floods     | <input type="checkbox"/> | <input type="checkbox"/> |
| Wildfires  | <input type="checkbox"/> | <input type="checkbox"/> |
| Heat Waves | <input type="checkbox"/> | <input type="checkbox"/> |
| Cyclones   | <input type="checkbox"/> | <input type="checkbox"/> |
| Landslides | <input type="checkbox"/> | <input type="checkbox"/> |

## 17. 17. Tick changes that you have noticed in your area for the past 20 years

Mark only one per row

|                                                                                            | Strongly Agree           | Agree                    | Strongly Disagree        | Disagree                 |
|--------------------------------------------------------------------------------------------|--------------------------|--------------------------|--------------------------|--------------------------|
| Do you agree that landscape has changed?                                                   | <input type="checkbox"/> | <input type="checkbox"/> | <input type="checkbox"/> | <input type="checkbox"/> |
| Has there be an increase in the buildings in the past 20 years?                            | <input type="checkbox"/> | <input type="checkbox"/> | <input type="checkbox"/> | <input type="checkbox"/> |
| Do you think that there has been growth of urban areas in the past 20 years?               | <input type="checkbox"/> | <input type="checkbox"/> | <input type="checkbox"/> | <input type="checkbox"/> |
| Has there been agricultural intensification?                                               | <input type="checkbox"/> | <input type="checkbox"/> | <input type="checkbox"/> | <input type="checkbox"/> |
| Air pollution                                                                              | <input type="checkbox"/> | <input type="checkbox"/> | <input type="checkbox"/> | <input type="checkbox"/> |
| Water pollution                                                                            | <input type="checkbox"/> | <input type="checkbox"/> | <input type="checkbox"/> | <input type="checkbox"/> |
| Increase in wildlife                                                                       | <input type="checkbox"/> | <input type="checkbox"/> | <input type="checkbox"/> | <input type="checkbox"/> |
| Do you agree that there is expansion and intensification of the forestry?                  | <input type="checkbox"/> | <input type="checkbox"/> | <input type="checkbox"/> | <input type="checkbox"/> |
| Do you agree that there has been extraction of non-renewable resources (e.g. sand mining)? | <input type="checkbox"/> | <input type="checkbox"/> | <input type="checkbox"/> | <input type="checkbox"/> |
| Increase on soil erosion                                                                   | <input type="checkbox"/> | <input type="checkbox"/> | <input type="checkbox"/> | <input type="checkbox"/> |
| Decline on soil quality                                                                    | <input type="checkbox"/> | <input type="checkbox"/> | <input type="checkbox"/> | <input type="checkbox"/> |
| Deforestation                                                                              | <input type="checkbox"/> | <input type="checkbox"/> | <input type="checkbox"/> | <input type="checkbox"/> |
| Overgrazing                                                                                | <input type="checkbox"/> | <input type="checkbox"/> | <input type="checkbox"/> | <input type="checkbox"/> |

# 18. 18. Do you agree that the following are impacts of climate change in the great Limpopo Trans-frontier Region

Mark only one per row

|                                                                                | Strongly Agree        | Agree                 | Strongly Disagree     | Disagree              |
|--------------------------------------------------------------------------------|-----------------------|-----------------------|-----------------------|-----------------------|
| loss of human life                                                             | <input type="radio"/> | <input type="radio"/> | <input type="radio"/> | <input type="radio"/> |
| damage to property                                                             | <input type="radio"/> | <input type="radio"/> | <input type="radio"/> | <input type="radio"/> |
| destruction of crops                                                           | <input type="radio"/> | <input type="radio"/> | <input type="radio"/> | <input type="radio"/> |
| loss of livestock                                                              | <input type="radio"/> | <input type="radio"/> | <input type="radio"/> | <input type="radio"/> |
| deterioration of health conditions owing to waterborne & vector borne diseases | <input type="radio"/> | <input type="radio"/> | <input type="radio"/> | <input type="radio"/> |
| vegetation Loss                                                                | <input type="radio"/> | <input type="radio"/> | <input type="radio"/> | <input type="radio"/> |
| Rainfall or Precipitation Deficiency                                           | <input type="radio"/> | <input type="radio"/> | <input type="radio"/> | <input type="radio"/> |
| Increase in Maximum Temperature                                                | <input type="radio"/> | <input type="radio"/> | <input type="radio"/> | <input type="radio"/> |
| Drought                                                                        | <input type="radio"/> | <input type="radio"/> | <input type="radio"/> | <input type="radio"/> |
| Drying of of water bodies (permanently)                                        | <input type="radio"/> | <input type="radio"/> | <input type="radio"/> | <input type="radio"/> |
| Migration and death of animals                                                 | <input type="radio"/> | <input type="radio"/> | <input type="radio"/> | <input type="radio"/> |
| Reduction in Crop yields                                                       | <input type="radio"/> | <input type="radio"/> | <input type="radio"/> | <input type="radio"/> |
| Tourism Reduction                                                              | <input type="radio"/> | <input type="radio"/> | <input type="radio"/> | <input type="radio"/> |
| Destruction of wetlands                                                        | <input type="radio"/> | <input type="radio"/> | <input type="radio"/> | <input type="radio"/> |

## 19. 19. Underlying drivers of Landscape Change

Mark only one per row

|                                                                                                                   | Strongly Agree        | Agree                 | Strongly Disagree     | Disagree              |
|-------------------------------------------------------------------------------------------------------------------|-----------------------|-----------------------|-----------------------|-----------------------|
| Do you agree that political and legislation aspects influence landscape change?                                   | <input type="radio"/> | <input type="radio"/> | <input type="radio"/> | <input type="radio"/> |
| Do you agree that the economy (prices, property, market, growth etc) influence landscape change within the area ? | <input type="radio"/> | <input type="radio"/> | <input type="radio"/> | <input type="radio"/> |
| Do you think culture (beliefs, age etc) influences landscape change within the area?                              | <input type="radio"/> | <input type="radio"/> | <input type="radio"/> | <input type="radio"/> |
| Do you agree that natural forces (climate, soil type, topography etc) impact landscape change within the area?    | <input type="radio"/> | <input type="radio"/> | <input type="radio"/> | <input type="radio"/> |

## 20. 20. What type of crops do you grow and for what purpose?

Mark only one per row

|              | Consumption              | Selling                  | None                     |
|--------------|--------------------------|--------------------------|--------------------------|
| Maize        | <input type="checkbox"/> | <input type="checkbox"/> | <input type="checkbox"/> |
| Sorghum      | <input type="checkbox"/> | <input type="checkbox"/> | <input type="checkbox"/> |
| Cotton       | <input type="checkbox"/> | <input type="checkbox"/> | <input type="checkbox"/> |
| Sugar Cane   | <input type="checkbox"/> | <input type="checkbox"/> | <input type="checkbox"/> |
| Butternuts   | <input type="checkbox"/> | <input type="checkbox"/> | <input type="checkbox"/> |
| Vegetables   | <input type="checkbox"/> | <input type="checkbox"/> | <input type="checkbox"/> |
| Water melons | <input type="checkbox"/> | <input type="checkbox"/> | <input type="checkbox"/> |
| Ground nuts  | <input type="checkbox"/> | <input type="checkbox"/> | <input type="checkbox"/> |
| Beans        | <input type="checkbox"/> | <input type="checkbox"/> | <input type="checkbox"/> |
| Round Nuts   | <input type="checkbox"/> | <input type="checkbox"/> | <input type="checkbox"/> |

## 21. 21. What type of livestock do you stock and for what purpose in your household?

Mark only one per row

|         | Consumption              | Selling                  | None                     | Other                    |
|---------|--------------------------|--------------------------|--------------------------|--------------------------|
| Cattle  | <input type="checkbox"/> | <input type="checkbox"/> | <input type="checkbox"/> | <input type="checkbox"/> |
| Goats   | <input type="checkbox"/> | <input type="checkbox"/> | <input type="checkbox"/> | <input type="checkbox"/> |
| Sheep   | <input type="checkbox"/> | <input type="checkbox"/> | <input type="checkbox"/> | <input type="checkbox"/> |
| Poultry | <input type="checkbox"/> | <input type="checkbox"/> | <input type="checkbox"/> | <input type="checkbox"/> |
| Donkeys | <input type="checkbox"/> | <input type="checkbox"/> | <input type="checkbox"/> | <input type="checkbox"/> |

22. 22. What is the legal status of your land?

Mark once where applicable

☐ Communal Land

☐ Lease

☐ Rented Freehold

☐ Other: \_\_\_\_\_

23. 23. Any other suggestions or comments?

---

---

---

---

---

This content is neither created nor endorsed by Google.

Google Forms
